# Supplementary material for: Li1.2Mn0.54Ni0.13Co0.13O2 nanosheets with porous structure as a high-performance cathode material for lithium-ion batteries
Source: Royal Society of Chemistry journal article supplement (doi:10.1039/d1ra06420g), 2021-01-01
Supplement: d1ra06420g1.pdf [file d1ra06420g1.pdf]

## Supplementary Information

### **Li<sub>1.2</sub>Mn<sub>0.54</sub>Ni<sub>0.13</sub>Co<sub>0.13</sub>O<sub>2</sub> nanosheets with porous structure as high-performance cathode material for lithium-ion batteries**

**Zhi Gao,<sup>a</sup> Wenliang Sun,<sup>a</sup> Xiaoliang Pan,<sup>\*a</sup> Shikun Xie,<sup>a</sup> Lijun Liu,<sup>b</sup> Chengning Xie,<sup>a</sup> and Huiling Yuan<sup>a</sup>**

*a. School of Mechanical Engineering, Jingtangshan University, Jian, 343009, China.*

*b. School of Chemistry and Chemical Engineering, Jingtangshan University, Jian, 343009, China.*

\*Corresponding author:

E-mail address: xiaoliang\_pan@163.com (X. L. Pan)

Table S1 The Rietveld refinement data obtained from XRD.

| Samples       | Lattice Constants |        |           |                   |     |     |      | R <sub>p</sub> /% | R <sub>wp</sub> /% | χ <sup>2</sup> | I <sub>(003)</sub> /I <sub>(104)</sub> |
|---------------|-------------------|--------|-----------|-------------------|-----|-----|------|-------------------|--------------------|----------------|----------------------------------------|
|               | a/Å               | c/Å    | c/a ratio | V/ Å <sup>3</sup> | α   | β   | γ    |                   |                    |                |                                        |
| Nanosheets    | 2.852             | 14.166 | 4.967     | 99.785            | 90° | 90° | 120° | 6.82              | 8.80               | 1.31           | 1.345                                  |
| Nanoparticles | 2.855             | 14.135 | 4.951     | 99.776            | 90° | 90° | 120° | 6.16              | 7.93               | 1.22           | 1.296                                  |
